# Supplementary material
Source: publisher site journal article supplement (https://www.dovepress.com/article/399764)
Supplement: Supplementary file 1 [file get_supplementary_file.php]

**Table S1.** Esohisto consensus guidelines<sup>9</sup>

| Criterion                          | Severity score |                                   |                                   |
|------------------------------------|----------------|-----------------------------------|-----------------------------------|
|                                    | 0 (<15%)       | 1 (15%-30%)                       | 2 (>30%)                          |
| Basal cell layer hyperplasia       | 0 (<15%)       | 1 (15%-30%)                       | 2 (>30%)                          |
| Papillary elongation               | 0 (<50%)       | 1 (50%-75%)                       | 2 (>75%)                          |
| Dilation of intercellular spaces   | 0 (absent)     | 1 (small; diameter <1 lymphocyte) | 2 (large; diameter ≥1 lymphocyte) |
| Infiltration of inflammatory cells |                |                                   |                                   |
| Intraepithelial eosinophils        | 0 (absent)     | 1 (1-2 cells)                     | 2 (>2 cells)                      |
| Intraepithelial neutrophils        | 0 (absent)     | 1 (1-2 cells)                     | 2 (>2 cells)                      |
| Intraepithelial mononuclear cells  | 0 (0-9 cells)  | 1 (10-30 cells)                   | 2 (>30 cells)                     |

**Table S2.** Patient's clinical symptoms

| Clinical symptoms            | Overall (n = 92) | GERD (n = 23) | Non-GERD (n = 69) | p-Value |
|------------------------------|------------------|---------------|-------------------|---------|
| Heartburn, n (%)             | 43 (46.7)        | 10 (43.5)     | 33 (47.8)         | 0.904   |
| Regurgitation, n (%)         | 69 (75.0)        | 17 (73.9)     | 52 (75.4)         | 1       |
| Belching, n (%)              | 60 (65.2)        | 17 (73.9)     | 43 (62.3)         | 0.448   |
| Acid reflux, n (%)           | 34 (37.0)        | 10 (43.5)     | 24 (34.8)         | 0.618   |
| Epigastric pain, n (%)       | 35 (38.0)        | 5 (21.7)      | 30 (43.5)         | 0.107   |
| Vomiting, n (%)              | 5 (5.4)          | 2 (8.7)       | 3 (4.3)           | 0.596   |
| Nausea, n (%)                | 16 (17.4)        | 6 (26.1)      | 10 (14.5)         | 0.217   |
| Bloating, n (%)              | 47 (51.1)        | 9 (39.1)      | 38 (55.1)         | 0.278   |
| Noncardiac chest pain, n (%) | 26 (28.3)        | 6 (26.1)      | 20 (29.0)         | 1       |
| Dysphagia, n (%)             | 14 (15.2)        | 1 (4.3)       | 13 (18.8)         | 0.176   |
| Weight loss, n (%)           | 10 (10.9)        | 1 (4.3)       | 9 (13.0)          | 0.442   |
| Chronic coughing, n (%)      | 8 (8.7)          | 2 (8.7)       | 6 (8.7)           | 1       |
| Sore throat, n (%)           | 31 (33.7)        | 6 (26.1)      | 25 (36.2)         | 0.524   |
| Dyspnea, n (%)               | 24 (26.1)        | 5 (21.7)      | 19 (27.5)         | 0.784   |
| Globus sensation, n (%)      | 40 (43.5)        | 7 (30.4)      | 33 (47.8)         | 0.225   |

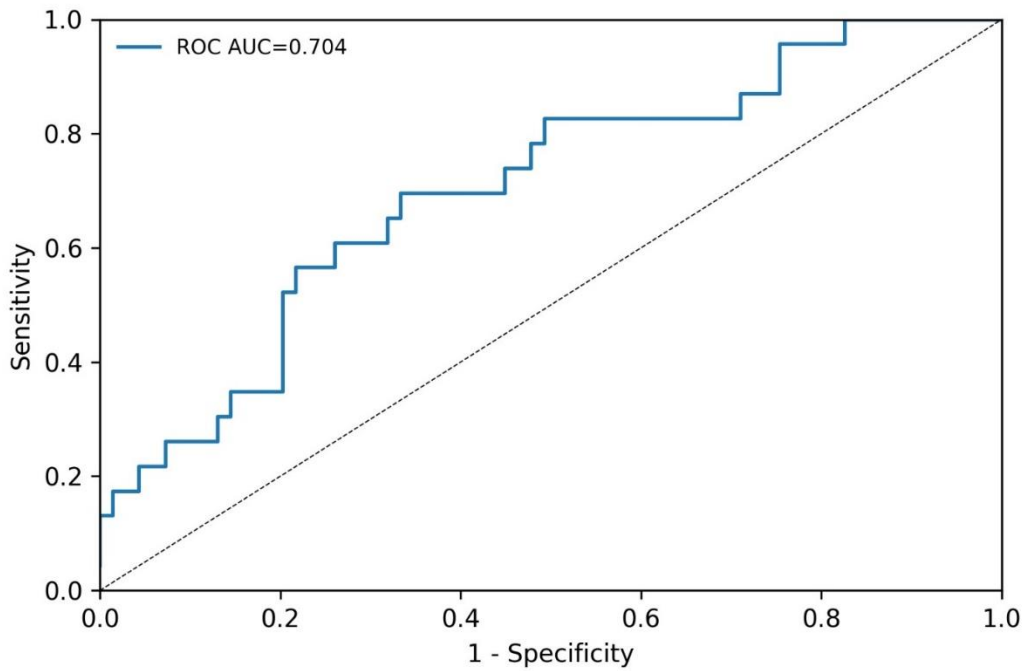

**Figure S1.** The received-operating characteristic curve of the logistic regression for GERD diagnosis.

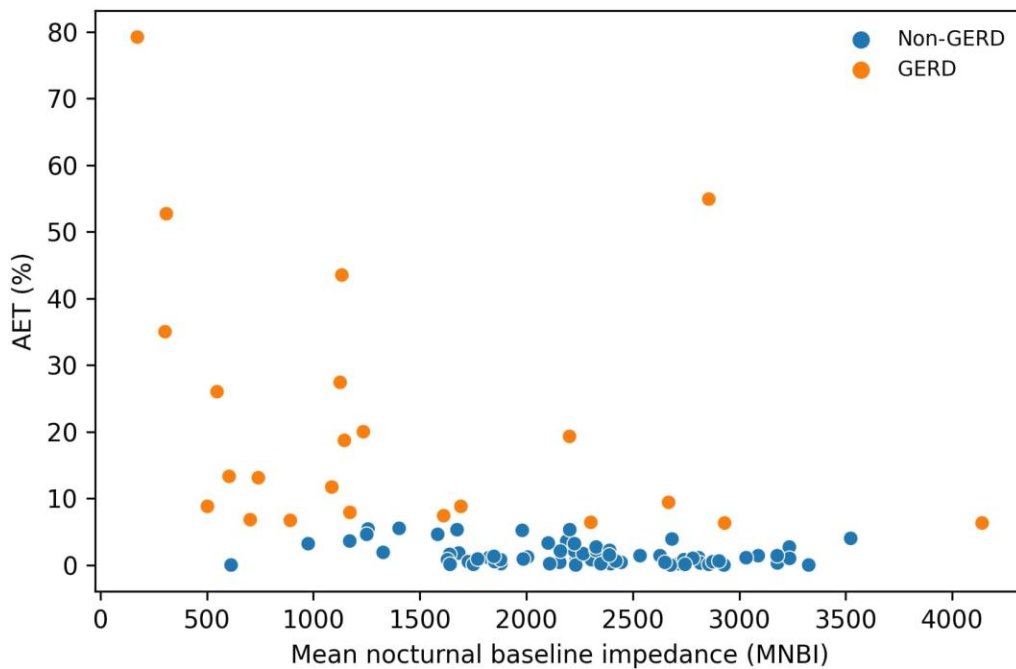

**Figure S2.** Correlation between mean nocturnal baseline impedance and acid exposure time
